# Supplementary material for: IL6-STAT3-HIF Signaling and Therapeutic Response to the Angiogenesis Inhibitor Sunitinib in Ovarian Clear Cell Cancer
Source: Oxford University Press journal article supplement (doi:10.1158/1078-0432.ccr-10-3314), 2011-02-22
Supplement: 10780432ccr103314-sup-supplementary_table_s1.xls [file 10780432ccr103314-sup-supplementary_table_s1.xls]

## Sheet: Serous
Supplementary Table 1: AOCS sample cohort and analyses performed
Serous
SAMPLEID	Stage	Serum IL6 level
20029	III	Y
22025	III	Y
22035	III	Y
32038	III	Y
34076	IV	Y
34108	I	Y
34180	III	Y
34181	I	Y
41012	IV	Y
41120	II	Y
41154	I	Y
41169	IV	Y
41300	III	Y
41328	II	Y
44306	III	Y
51005	IV	Y
51104	III	Y
51130	III	Y
60020	III	Y
60139	III	Y
60168	II	Y
60183	I	Y
60202	I	Y
60205	III	Y
60261	I	Y
60328	II	Y
70001	III	Y
Clear Cell
SAMPLEID	Stage	Serum IL6 level	Gene Expression	Copy Number	Protein Expression (TMA)
20063	I	Y	N	N	N
22054	II	Y	N	N	N
22067	I	Y	Y	Y	Y
22087	III	N	Y	Y	Y
22812	III	N	N	N	Y
22828	I	N	N	N	Y
23011	III	Y	N	N	N
23083	I	N	Y	Y	Y
23114	III	Y	Y	Y	Y
23148	I	N	N	N	Y
23175	III	N	N	N	Y
23208	II	N	Y	Y	Y
23803	III	N	N	N	Y
27076	III	Y	N	N	N
32052	III	Y	Y	Y	Y
32061	III	Y	Y	N	N
32065	III	Y	Y	Y	Y
32816	I	N	N	N	Y
32822	I	N	N	N	Y
34001	III	N	N	Y	N
34032	I	N	Y	Y	Y
34035	III	Y	Y	Y	N
34055	IV	Y	N	Y	Y
34106	IV	Y	N	N	N
34118	III	Y	N	N	N
34122	I	Y	Y	Y	Y
34152	III	N	Y	Y	Y
34163	II	Y	Y	Y	N
34179	I	Y	Y	Y	Y
34182	III	Y	Y	Y	Y
34215	I	N	N	Y	N
34228	II	N	Y	Y	N
34800	III	N	N	N	Y
34831	II	N	N	Y	N
41056	I	Y	Y	Y	Y
41071	I	N	N	N	N
41103	IV	N	N	N	N
41109	III	Y	N	N	N
41110	I	N	N	N	N
41207	III	N	N	N	N
41209	II	Y	Y	N	Y
41314	I	N	N	N	N
41378	I	N	N	Y	Y
41384	I	N	Y	N	Y
41815	I	N	N	Y	N
44031	II	N	N	N	N
44042	I	N	N	N	Y
44071	I	N	N	N	N
44095	II	N	Y	Y	Y
44123	I	N	N	N	N
44142	I	N	Y	Y	Y
44152	II	N	Y	Y	Y
44182	I	Y	Y	Y	Y
44246	IV	Y	N	N	N
44332	III	Y	Y	Y	Y
44579	III	N	N	N	N
44801	I	N	Y	Y	Y
49017	III	N	N	N	Y
51003	I	N	N	N	N
51032	III	Y	N	N	N
51066	I	Y	N	Y	Y
51079	III	Y	N	N	Y
51118	III	Y	N	N	N
51186	I	N	Y	N	Y
51196	II	N	N	N	Y
60001	IV	Y	N	N	N
60152	NA	N	N	N	N
60292	I	Y	N	Y	N
60300	I	Y	Y	Y	N
60340	I	Y	N	N	Y
70041	I	Y	Y	Y	N
70149	III	N	N	N	Y
93072	III	N	Y	N	N
IC349	NA	N	Y	Y	N
IC419	I	N	N	Y	N
IC511	III	N	N	Y	N
IC549	NA	N	Y	Y	N
P1094	I	N	N	Y	N
P1556	NA	N	N	Y	N
P511	II	N	N	Y	N
