# Supplementary material for: IL6-STAT3-HIF Signaling and Therapeutic Response to the Angiogenesis Inhibitor Sunitinib in Ovarian Clear Cell Cancer
Source: Oxford University Press journal article supplement (doi:10.1158/1078-0432.ccr-10-3314), 2011-02-22
Supplement: 10780432ccr103314-sup-supplementary_table_s5.xls [file 10780432ccr103314-sup-supplementary_table_s5.xls]

## Sheet: Sheet1
Supplementary Table 5: Gene ontology analysis of genes associated with minimal regions of copy number gain or loss
Category	Ontology Term	Fold Enrichment	p-value	FDR
Panther db
Molecular Function	MF00198:Structural protein	1.67864	1.85759e-08	2.39926e-05
Molecular Function	MF00233:Interferon	3.63225	7.8451e-08	0.000101327
Biological Process	BP00117:JAK-STAT cascade	1.82512	0.000109033	0.139888
Molecular Function	MF00006:Interleukin receptor	2.30408	0.000114864	0.148257
Molecular Function	MF00256:Intermediate filament	1.60565	0.000182493	0.235452
Biological Process	BP00115:NF-kappaB cascade	1.84908	0.000264695	0.339287
Molecular Function	MF00154:Metalloprotease	1.52234	0.000502147	0.646636
Molecular Function	MF00017:Cytokine	1.6492	0.000822239	1.05682
Molecular Function	MF00091:Cytoskeletal protein	1.19739	0.00111405	1.42939
Biological Process	BP00107:Cytokine and chemokine mediated signaling pathway	1.37143	0.00151015	1.92152
Molecular Function	MF00197:Miscellaneous function	1.18617	0.00171749	2.19575
Biological Process	BP00111:Intracellular signaling cascade	1.17526	0.00233192	2.95278
Biological Process	BP00250:Muscle development	1.46813	0.00306121	3.85959
Molecular Function	MF00176:Antibacterial response protein	1.86521	0.009959	12.1268
Molecular Function	MF00127:Reductase	1.3616	0.0105324	12.7819
Molecular Function	MF00258:CAM family adhesion molecule	1.58853	0.0107675	13.0491
Molecular Function	MF00230:Actin binding motor protein	1.69149	0.015517	18.2896
Molecular Function	MF00016:Signaling molecule	1.13953	0.0184784	21.408
Molecular Function	MF00005:Cytokine receptor	1.49022	0.0203357	23.3073
Kegg db
Pathway	hsa04630:Jak-STAT signaling pathway	1.64686	1.34699e-05	0.0167976
Pathway	hsa04623:Cytosolic DNA-sensing pathway	1.84172	0.00151795	1.8767
Pathway	hsa04620:Toll-like receptor signaling pathway	1.60467	0.00119006	1.47409
Pathway	hsa05220:Chronic myeloid leukemia	1.56669	0.00950679	11.2308
Pathway	hsa05222:Small cell lung cancer	1.4953	0.0148186	16.9886
Pathway	hsa04140:Regulation of autophagy	1.85225	0.0136302	15.7311
Pathway	hsa04360:Axon guidance	1.31919	0.0387146	38.8855
Pathway	hsa05221:Acute myeloid leukemia	1.53689	0.0324156	33.6991
Pathway	hsa04914:Progesterone-mediated oocyte maturation	1.41342	0.0359925	36.6918
